# Supplementary material
Source: PubMed Central journal article supplement (PMC3416504)
Supplement: supp_11.7.856_CombinedSuppMaterial.pdf [file supp_11.7.856_CombinedSuppMaterial.pdf]

## SUPPLEMENTAL MATERIAL

**Supplemental Table 1.** Primers used for amplification of the expression constructs used in this study.

| Name                 | Sequence 5'-3'                                  | Restriction Site |
|----------------------|-------------------------------------------------|------------------|
| CrΔ4FAD_NdeI-F       | TA <b>CATATG</b> <u>ATGAACGCCACGATGCAG</u>      | NdeI             |
| CrΔ4FAD_NdeI-R       | CG <b>CATATG</b> <u>GAACCTGGAGAGCATCAG</u>      | NdeI             |
| CrΔ4FAD_XbaI-F2      | TA <b>TCTAGA</b> <u>ATGAACGCCACGATGCAG</u>      | XbaI             |
| CrΔ4FAD_XhoI-R2      | CG <b>CTCGAG</b> <u>GAACCTGGAGAGCATCAG</u>      | XhoI             |
| CrΔ4Cytb5_EcoRI-F    | TA <b>GAATTC</b> ATG <u>GTCGCTGAGCCCGTCGTTG</u> | EcoRI            |
| CrΔ4Cytb5_XhoI-R     | TATA <b>CTCGAG</b> <u>GGAGGCGGCAACCTCGG</u>     | XhoI             |
| CrFAD13Cytb5_EcoRI-F | TA <b>GAATTC</b> <u>ATGTGCAGGCCTACCGATTCC</u>   | EcoRI            |
| CrFAD13Cytb5_XhoI-R  | TA <b>CTCGAG</b> <u>CGCGCTGATGGTCGACAC</u>      | XhoI             |
| AtCytb5_EcoRI-F      | GC <b>GAATTC</b> <u>ATGCCGACACTCACAAAGC</u>     | EcoRI            |
| AtCytb5_XhoI-R       | GC <b>CTCGAG</b> <u>AGTCTTGCGAGAGAAC</u>        | XhoI             |

**Supplemental Table 2.** Primers used for semi quantitative RT-PCR

| Name          | Sequence                       | Size             | No of cycles |
|---------------|--------------------------------|------------------|--------------|
| CrMGD1-int-F  | 5'- CAGCAGCACTTCTGGCAATGTC -3' | 458 bp (genomic) | 30           |
| CrMGD1-int-R  | 5'- CTCCTGGAAAGCCGCTTTGATG -3' | 290 bp (cDNA)    |              |
| CrDGD1-int-F  | 5'- GGTTCTTCGAGCAGTTCC -3'     | 756 bp (genomic) | 30           |
| CrDGD1-int-R  | 5'- GACGGCTTGTAGTCAGTG -3'     | 322 bp (cDNA)    |              |
| CrRACK1-int-F | 5'- GTGCTGTCCGTGGCTTTCTC -3'   | 637 bp (genomic) | 24           |
| CrRACK1-int-R | 5'- GGCCACCAGGTTGTTCTTC -3'    | 253 bp (cDNA)    |              |
| CrΔ4FAD-int-F | 5'- TGTGGGCGCTCTTCCCCTTC -3'   | 891 bp (genomic) | 34           |
| CrΔ4FAD-int-R | 5'- GCGCTCTCGTCCAGTTCTC -3'    | 325 bp (cDNA)    |              |

## References

**Guschina, I.A., and Harwood, J.L.** (2006) Lipids and lipid metabolism in eukaryotic algae.

*Prog. Lipid Res.* 45, 160-186.

**Meyer, A., Kirsch, H., Domergue, F., Abbadi, A., Sperling, P., Bauer, J., Cirpus, P.,**

**Zank, T.K., Moreau, H., Roscoe, T.J., Zähringer, U., and Heinz, E.** (2004) Novel fatty acid elongases and their use for the reconstitution of docosahexaenoic acid biosynthesis. *J. Lipid*

*Res.* 45, 1899-1909.

**Supplemental Figure 1.** Schematic representation of biosyntheses of polyunsaturated acyl groups.

Synthesis of PUFAs in most microalgae involves stepwise action of specific fatty acid desaturases and elongases (modified after (Meyer et al., 2004)). While the  $\Delta 6$ - and  $\Delta 5$ -elongases exclusively utilize acyl-CoAs, the substrates for most desaturases are lipids (mostly phosphatidylcholine, PtdCho or monogalactosyldiacylglycerol, MGDG). The dominant order of the steps in most microalgae is indicated with bold arrows. Some algae such as *Euglena* or *Isochrysis* synthesize EPA and DHA via an alternative pathway which is  $\Delta 6$ -desaturase- and  $\Delta 6$ -elongase independent. Instead  $18:3^{\Delta 9,12,15}$  is elongated to  $20:3^{\Delta 11,14,17}$  and then desaturated at the  $\Delta 8$ -position (Guschina and Harwood, 2006). The  $\Delta 4$ -desaturase independent pathway of DHA synthesis from EPA (the so-called “Sprecher pathway”) is displayed with gray arrows. It is found in mammals.

(b) Synthesis of pinolenic and coniferonic acids in *Chlamydomonas*. *Chlamydomonas* does neither contain a  $\Delta 6$ - nor  $\Delta 5$ -elongase and thus cannot synthesize  $C_{20}$  or  $C_{22}$  fatty acids. The alga also lacks a  $\Delta 6$ -desaturase. But the activity of a  $\Delta 5$ -desaturase results in the accumulation of  $18:3^{\Delta 5,9,12}$  and  $18:4^{\Delta 5,9,12,15}$  in ER lipids. These fatty acids are also known as pinolenic and coniferonic acid since they were first discovered in pine trees.

(c) Synthesis of hexadecatetraenoic acid (16:4) in the plastid of *Chlamydomonas*. The synthesis of  $18:3^{\Delta 9,12,15}$  and  $16:3^{\Delta 7,10,13}$  is accomplished in the same way as in vascular plants. All desaturation steps most likely occur on MGDG. The synthesis of  $16:4^{\Delta 4,7,10,13}$  involves the activity of an additional  $\Delta 4$ -desaturase (named Cr $\Delta 4$ FAD). Since 16:4 is limited to MGDG, Cr $\Delta 4$ FAD is expected to be located in the plastid, using mainly  $16:3^{\Delta 7,10,13}$  as substrate. Abbreviations: DES – desaturase, DHA – docosahexaenoic acid, ELO – elongase, EPA – eicosapentaenoic acid.

A Synthesis of EPA and DHA (in the ER of microalgae)

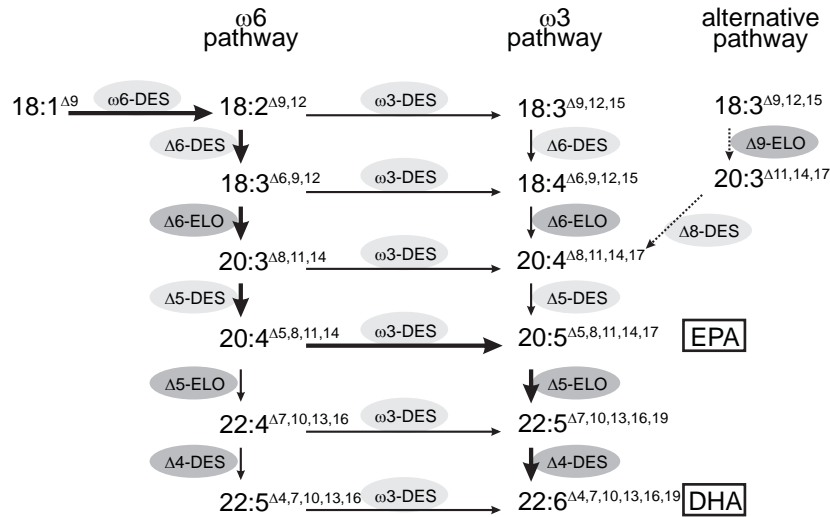

B PUFA biosynthesis in the ER of Chlamydomonas

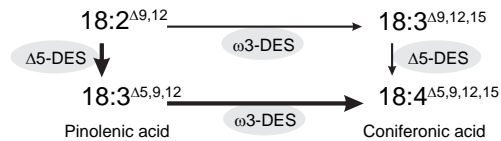

C PUFA biosynthesis in the plastid of Chlamydomonas

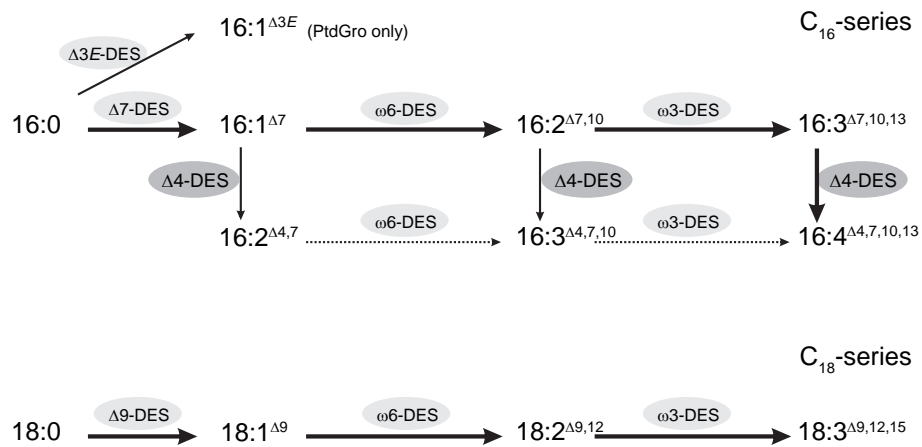

**Supplemental Figure 2.** Protein sequence alignment of Cr $\Delta$ 4FAD and known  $\Delta$ 4-desaturases.

The  $\Delta$ 4-desaturases from *Thalassiosira pseudonana* (AAX14506), *Thraustochytrium tricorutum* (CAI58877) and *Euglena gracilis* (AAQ19605) were included in the analysis. Positions of the transmembrane helices (TM), histidine boxes, cytochrome  $b_5$ -domains, and the putative chloroplast transit peptide (cTP) of Cr $\Delta$ 4FAD are indicated. Note that the N-terminal sequence extension found in the sequence from *Euglena* was not recognized as transit peptide by any of the tested prediction programs.

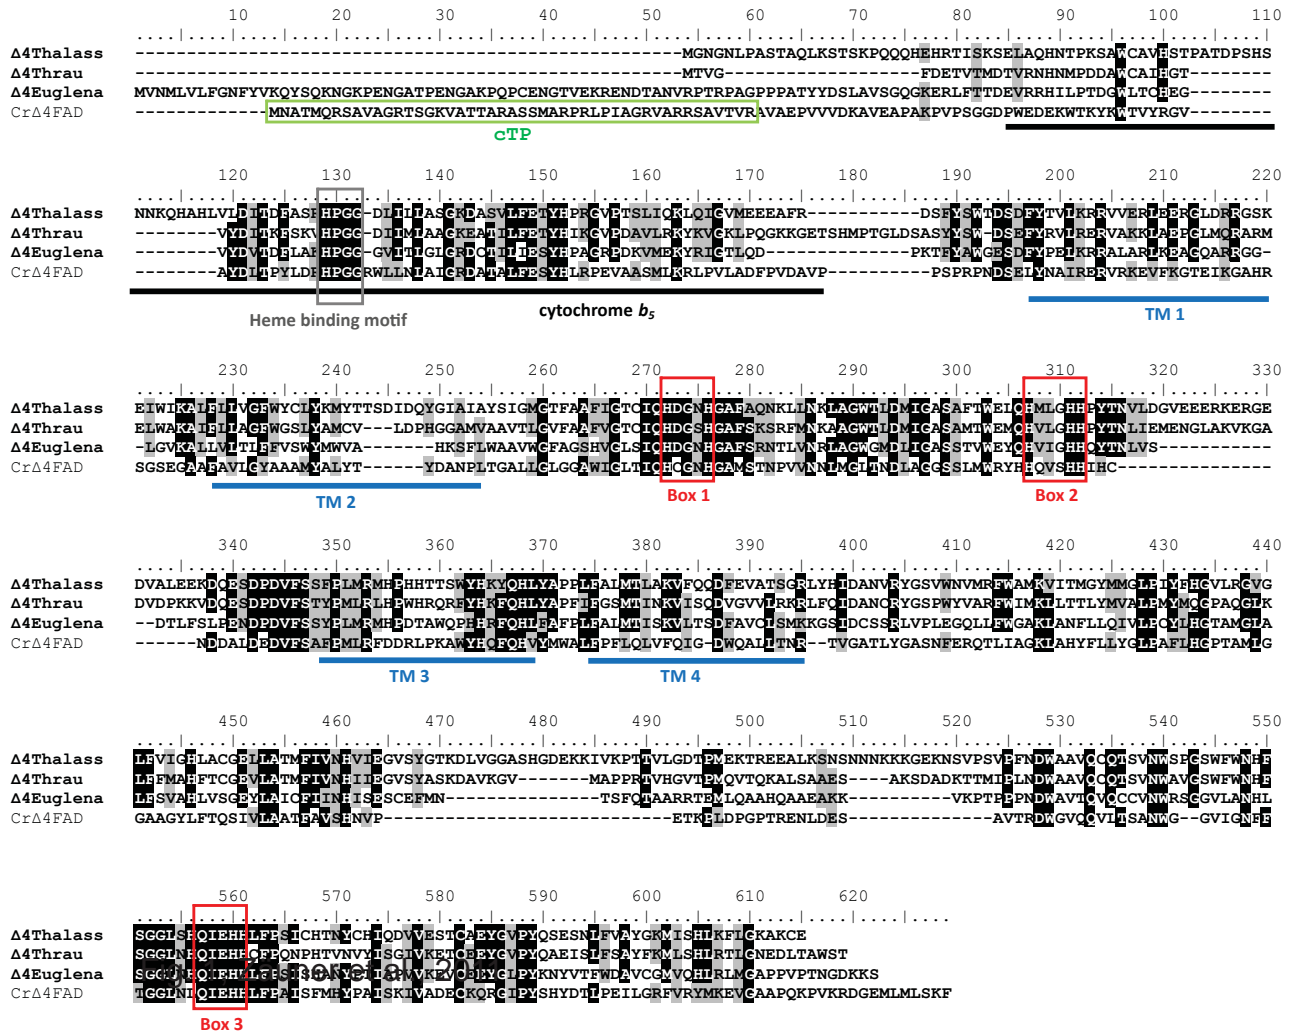

Supplemental Figure 2, Zauner et al, 2012

**Supplemental Figure 3. Supplemental Figure.** Comparison of different fatty acid desaturases.

**(A)** Regioselectivity dendrogram of desaturase-like sequences. Cr $\Delta$ 4FAD is marked in red. Regioselectivities are marked by numbers ( $\Delta$ - and  $\omega$ -desaturases) and subcellular localization (PL=plastid, ER=Endoplasmatic Reticulum). The branches labeled C2OH and C4LCBOH refer to the sphingolipid modifying enzymes acyl amide  $\alpha$ -hydroxylases and long chain base (LCB) C4-hydroxylases, whereas  $\Delta$ 4LCB and  $\Delta$ 8LCB refer to LCB desaturases. The branch containing acyl amide  $\Delta$ 3 desaturase sequences is labeled  $\Delta$ 3SL; ERG3 and ERG25 refer to C5-sterol desaturase and C4-sterol methyl oxidase sequences, respectively. All sphingolipid and sterol-modifying enzyme groups are highlighted by a grey background. Cytochrome  $b_5$ -fusion proteins are indicated by *dashed lines* (C-terminal fusion) and *dotted lines* (N-terminal fusion), respectively. GenBank<sup>TM</sup> protein accession numbers are as follows: (1) XP\_001699995, (2) XP\_715359, (3) XP\_383758, (4) NP\_563944, (5) NP\_177122, (6) XP\_722116, (7) XP\_390550, (8) NP\_192402, (9) AF466375, (10) XP\_383758, (11) XP\_368852, (12) AB006677, (13) XP\_714854, (14) XP\_386360, (15) [BAA03434](#), (16) NP\_565721, (17) [NP\\_172098](#), (18) NP\_172098, (19) XM\_001701218, (20) XP\_001694618, (21) XP\_388066, (22) XP\_385960, (23) XP\_722258, (24) XP\_714324, (25) NP\_850139, (26) XP\_001691669, (27) XP\_001689663, (28) NP\_180559, (29) NP\_187727, (30) NP\_196177, (31) NP\_194824, (32) [XP\\_001693068](#), (33) [YP\\_324705](#), (34) [AAM09687](#), (35) XP\_719958, (36) XP\_390021, (37) [XP\\_002291331](#), (38) [XP\\_001778179](#), (39) AAG43277, (40) [NP\\_191717](#), (41) [NP\\_182144](#), (42) [AAC49700](#), (43) ABV23278, (44) [AAD45877](#), (45) [XP\\_002291529](#), (46) [XP\\_002182901](#), (47) CAB94993, (48) CAB94992, (49) [AAF29378](#), (50) [NP\\_004256](#), (51) [NP\\_068373](#), (52) AAS75335, (53) XP\_001698534, (54) AAX14502, (55) XP\_002296867, (56) JN089704, (57) AAX14506, (58) [AAN75710](#), (59) CAA60573, (60) [NP\\_441824](#), (61) XP\_717303, (62) XP\_385340, (63) NM\_129030, (64) NM\_11820, (65) XP\_713612, (66) XP\_382678, (67) NP\_192948, (68) XP\_001701457, (69) XP\_390006, (70) XP\_722703, (71) XP\_713456, (72) NP\_567670, (73) NP\_850133, (74) NP\_563789.

**(B)** Schematic structure of desaturase-like sequences. Positions of Cytochrome  $b_5$  domains (Cyt  $b_5$ ), histidine boxes (Box1-3) and transmembrane domains (TM) are indicated. Note that the positions of the histidine boxes of FAD4 are different from that found in other sequences.



A

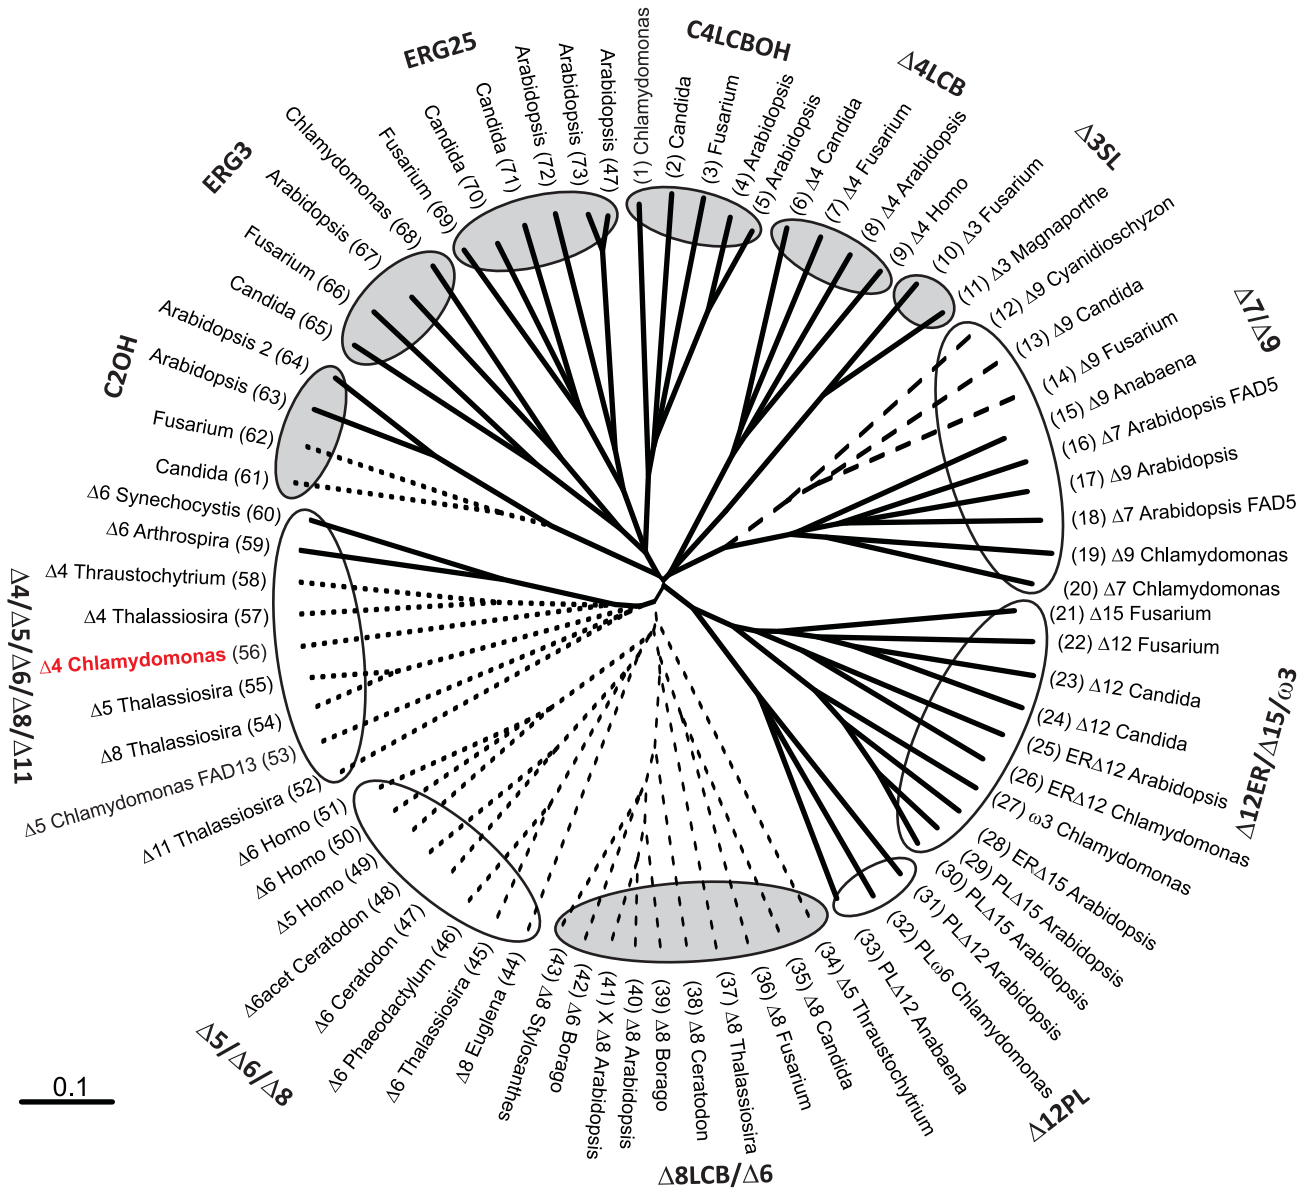

B

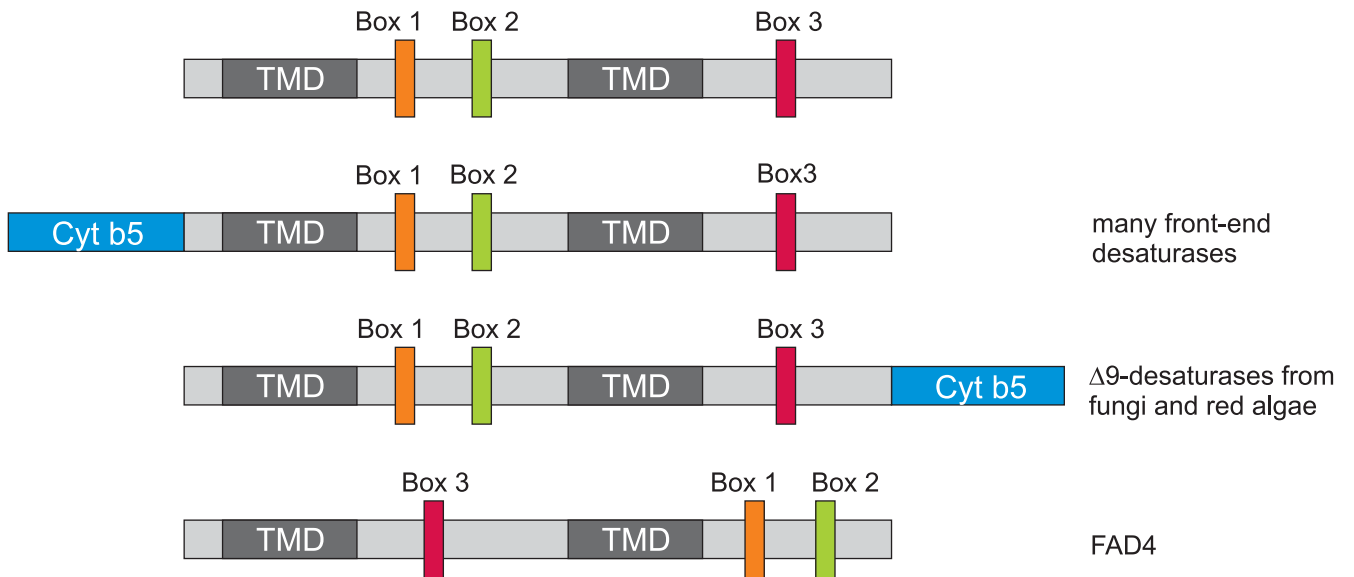

Supplemental Figure 3, Zauner et al, so12

**Supplemental Figure 4.** Chlorophyll a/Chlorophyll b ratio of transgenic *Chlamydomonas* lines. Pigments were isolated, their absorbance spectra detected in 80 % acetone and used for calculation of chlorophyll a and chlorophyll b content. Data were obtained from 6 independent experiments.

### Chlorophyll a/b

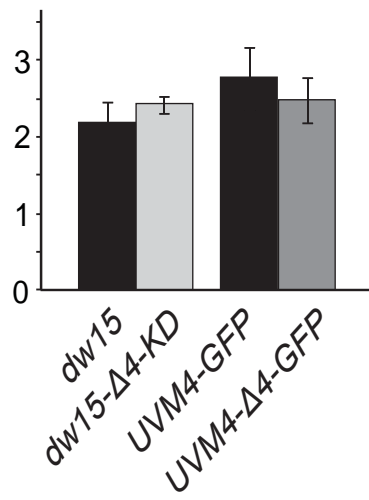

Supplemental Figure 4, Zauner et al, 2012
